# Supplementary material
Source: Springer Nature journal article supplement (https://www.springermedizin.de/resource/supplementary/13256_2011_2107_MOESM3_ESM.pdf/9649040)

C-KIT

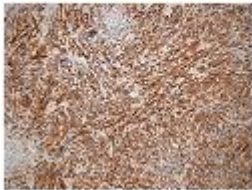

CD 34

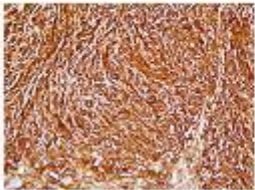

Supplement: MOESM3 [file 9649040]
